## CORRECTION

# Correction: Comparative prognostic accuracy of sepsis scores for hospital mortality in adults with suspected infection in non-ICU and ICU at an academic public hospital

Christopher P. Kovach, Grant S. Fletcher, Kristina E. Rudd, Rosemary M. Grant, David J. Carlbom

The word "populations" is missing from the article title. The correct title is: Comparative prognostic accuracy of sepsis scores for hospital mortality in adults with suspected infection in non-ICU and ICU populations at an academic public hospital. The correct citation is: Kovach CP, Fletcher GS, Rudd KE, Grant RM, Carlbom DJ (2019) Comparative prognostic accuracy of sepsis scores for hospital mortality in adults with suspected infection in non-ICU and ICU populations at an academic public hospital. PLoS ONE 14(9): e0222563. <https://doi.org/10.1371/journal.pone.0222563>.

## Reference

1. Kovach CP, Fletcher GS, Rudd KE, Grant RM, Carlbom DJ (2019) Comparative prognostic accuracy of sepsis scores for hospital mortality in adults with suspected infection in non-ICU and ICU at an academic public hospital. PLoS ONE 14(9): e0222563. <https://doi.org/10.1371/journal.pone.0222563> PMID: 31525224

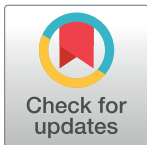

## OPEN ACCESS

**Citation:** Kovach CP, Fletcher GS, Rudd KE, Grant RM, Carlbom DJ (2019) Correction: Comparative prognostic accuracy of sepsis scores for hospital mortality in adults with suspected infection in non-ICU and ICU at an academic public hospital. PLoS ONE 14(10): e0224780. <https://doi.org/10.1371/journal.pone.0224780>

**Published:** October 30, 2019

**Copyright:** © 2019 Kovach et al. This is an open access article distributed under the terms of the [Creative Commons Attribution License](https://creativecommons.org/licenses/by/4.0/), which permits unrestricted use, distribution, and reproduction in any medium, provided the original author and source are credited.
